# Supplementary material for: Strain engineering of optoelectronic and ferroelectric properties in R 3-phase Zn 3 TeO 6 : a first-principles study
Source: Royal Society of Chemistry journal article supplement (doi:10.1039/d5ra08570e), 2026-01-01
Supplement: d5ra08570e1.pdf [file d5ra08570e1.pdf]

# Strain Engineering of Optoelectronic and Ferroelectric Properties in R3-Phase $\text{Zn}_3\text{TeO}_6$ : A First-Principles Study

## Supporting Information

Xing-Yuan Chen <sup>1\*</sup>, Guo-Wei Lai<sup>1</sup>, Tu-Rong Ning<sup>1</sup>, Yan-Li Hu<sup>1</sup>, Xiao-Dong Yang<sup>1</sup>, Shuang-Rui Chen<sup>2</sup>, Yin Liu<sup>1</sup>, Hua-Kai Xu<sup>1\*</sup>

<sup>1</sup>Department of Physics, School of Science, Guangdong University of Petrochemical Technology, Maoming, Guangdong 525000, PR China

<sup>2</sup>Department of Architectural Engineering, Guangdong University of Petrochemical Technology

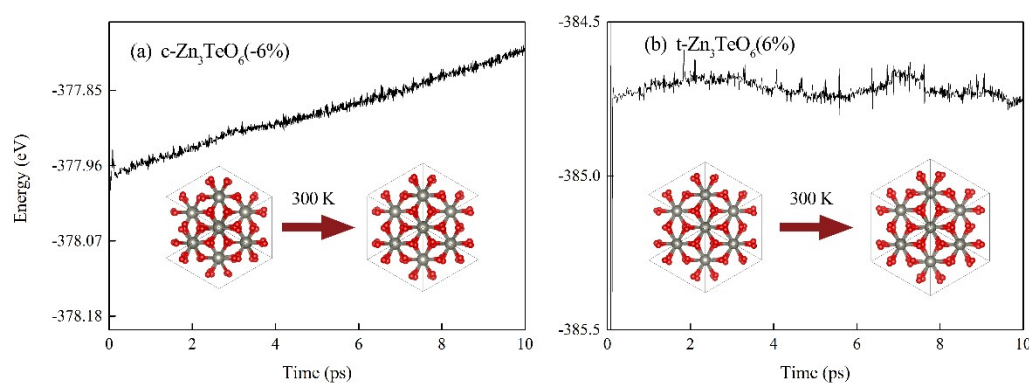

Fig.S1. AIMD energy evolution of  $\text{Zn}_3\text{TeO}_6$  under (a)  $-6\%$  compressive strain and (b)  $+6\%$  tensile strain.

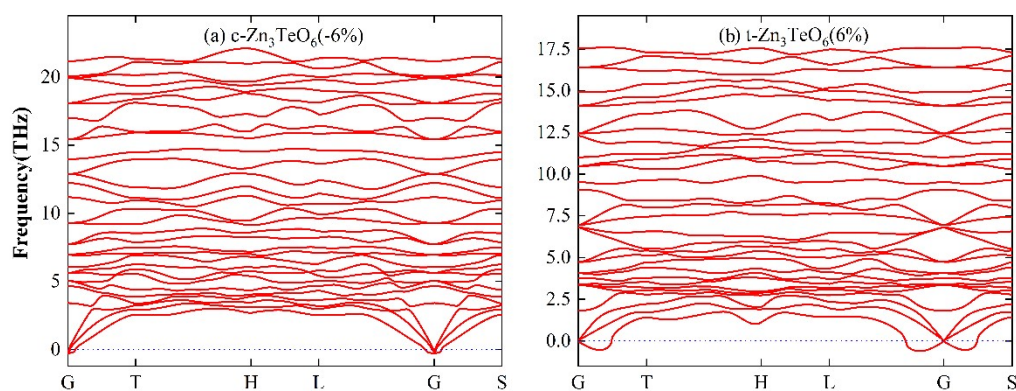

Fig.S2. The calculated phonon frequency of (a)  $-6\%$  compressive strain and (b)  $+6\%$  tensile strain.

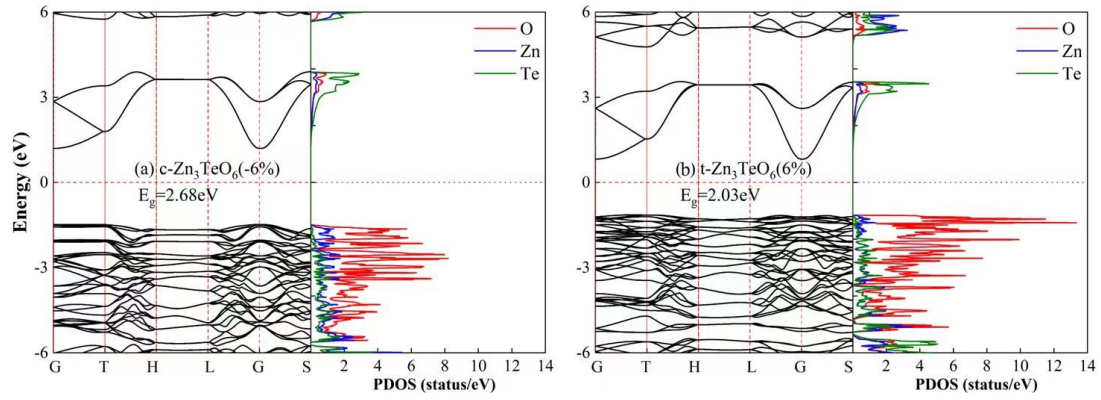

Fig.S3 The calculated band structure and density of states of (a)  $-6\%$  compressive strain and (b)  $+6\%$  tensile strain.

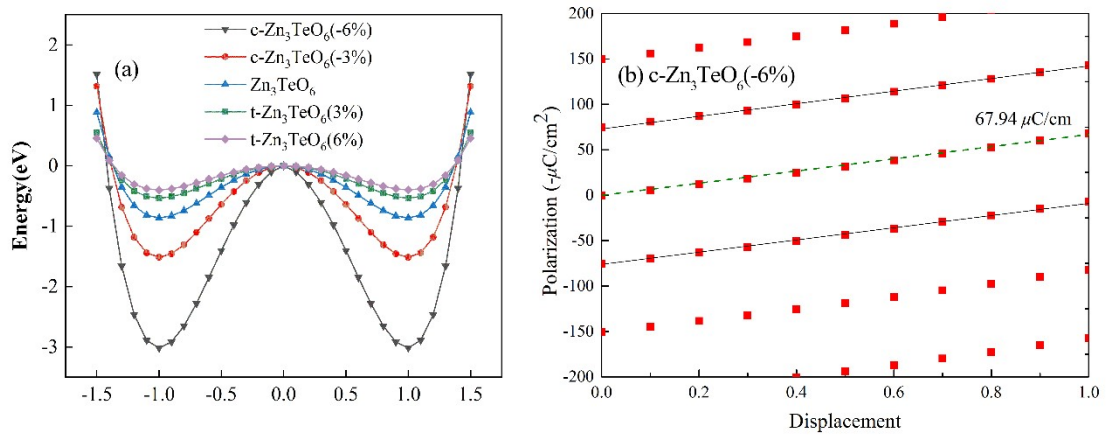

Fig.S4. (a) Potential energy curve and (b) ferroelectric polarization as a function of structural distortion under  $-6\%$  compressive strain.
